# Supplementary material for: In vivo assessment of Lewy body and beta-amyloid copathologies in idiopathic normal pressure hydrocephalus: prevalence and associations with clinical features and surgery outcome
Source: Springer Nature journal article supplement (doi:10.1186/s12987-022-00368-2), 2022-09-07
Supplement: MOESM1 [file 23463432]

## ADDITIONAL FILE 1

### SUPPLEMENTARY MATERIALS

#### List of contents

|               |   |
|---------------|---|
| Table S1..... | 2 |
| Table S2..... | 3 |
| Table S3..... | 4 |
| Table S4..... | 5 |
| Table S5..... | 7 |
| Table S6..... | 8 |

**Table S1.** Summary of evaluations in the included cohorts.

|                                                   | <b>NPH Pro-Hydro</b> | <b>NPH Kuopio</b> | <b>CJD</b> | <b>DLB</b> |
|---------------------------------------------------|----------------------|-------------------|------------|------------|
| Demographic                                       | √                    | √                 | √          | √          |
| CSF $\alpha$ -syn RT-QuIC                         | √                    | √                 | √          | √          |
| CSF A $\beta$                                     | √                    | √                 |            |            |
| CSF NfL                                           | √                    |                   |            |            |
| Association CSF biomarkers and clinical variables | √                    |                   |            |            |
| Outcome evaluation                                | √                    |                   |            |            |
| Neuropathology                                    |                      |                   | √          |            |

Legend=: NPH: normal pressure hydrocephalus; CJD, Creutzfeldt-Jakob disease; DLB, dementia with Lewy bodies; RT-QuIC, real-time quaking-induced conversion;  $\alpha$ -syn,  $\alpha$ -synuclein; A $\beta$ , amyloid-beta; NfL, neurofilament light chain.

**Table S2.** Demographic data and summary of  $\alpha$ -syn RT-QuIC results in the CJD cohort.

|                                       | <b>CJD group</b>  |
|---------------------------------------|-------------------|
| N                                     | 89                |
| Female, n (%)                         | 46 (51.7)         |
| Age at lumbar puncture (years)        | 75.2 $\pm$ 4.9    |
| Definite/probable*, n (%)             | 60/29 (67.4/32.6) |
| Positive $\alpha$ -syn RT-QuIC, n (%) |                   |
| - Definite                            | 4 (6.7)           |
| - Probable                            | 2 (6.9)           |

\*Definite and probable CJD diagnoses were formulated according with the updated European diagnostic criteria (<https://www.eurocjd.ed.ac.uk/node/833>).

Legend= CJD: Creutzfeldt-Jakob disease; RT-QuIC: real-time quaking-induced conversion;  $\alpha$ -syn:  $\alpha$ -synuclein.

**Table S3.** Summary of demographic and clinical features and results of indicative biomarkers of DLB individuals.

|                                                        | <b>DLB group</b> |
|--------------------------------------------------------|------------------|
| N                                                      | 45               |
| Female, n (%)                                          | 17 (37.8)        |
| Age at lumbar puncture (years)                         | 73.7±5.9         |
| Time between disease onset and lumbar puncture (years) | 5.4±4.6          |
| Clinical features, n (%)                               |                  |
| - Dementia ( <i>essential feature</i> )                | 45 (100)         |
| - Visual hallucinations                                | 31 (68.9)        |
| - Fluctuations                                         | 17 (37.8)        |
| - Parkinsonism                                         | 40 (88.9)        |
| - REM sleep behavior disorder                          | 20 (44.4)        |
| Indicative biomarkers, positive/tested (%)             |                  |
| - SPECT DaTscan                                        | 20/22 (90.9)     |
| - <sup>123</sup> I-MIBG myocardial uptake              | 13/13 (100)      |
| - REM sleep without atonia at polysomnography          | 7/14 (50.0)      |

Legend= DLB: dementia with Lewy bodies; MIBG: metaiodobenzylguanidine.

**Table S4.** Baseline clinical features of the Bologna PRO-HYDRO cohort and comparisons between  $\alpha$ -syn<sup>LB</sup> + and  $\alpha$ -syn<sup>LB</sup> -.

|                                                  | <b>Bologna iNPH cohort</b> | <b><math>\alpha</math>-syn<sup>LB</sup> +</b> | <b><math>\alpha</math>-syn<sup>LB</sup> -</b> | <b><i>p-value</i></b> |
|--------------------------------------------------|----------------------------|-----------------------------------------------|-----------------------------------------------|-----------------------|
| <b>N</b>                                         | 127                        | 28                                            | 99                                            |                       |
| <b>Males, <i>n</i> (%)</b>                       | 83 (65.4)                  | 16 (57.1)                                     | 67 (67.7)                                     | 0.208                 |
| <b>Age at evaluation, <i>years</i></b>           | 76.0 (72.0-79.0)           | 76.0 (72.0-80.5)                              | 76.0 (72.0-79.0)                              | 0.760                 |
| <b>Age at disease onset, <i>years</i></b>        | 73.0 (69.0-76.0)           | 74.5 (69.0-78.0)                              | 72.0 (69.0-76.0)                              | 0.313                 |
| <b>Disease duration &lt;1 year, <i>n</i> (%)</b> | 21 (16.5)                  | 6 (21.4)                                      | 15 (15.2)                                     | 0.447                 |
| <b>Symptoms at first evaluation</b>              |                            |                                               |                                               |                       |
| Gait disorders, <i>n</i> (%)                     | 119 (98.4)                 | 25 (89.3)                                     | 94 (94.9)                                     | 0.385                 |
| Urinary dysfunctions, <i>n</i> (%)               | 100 (82.6)                 | 23 (82.1)                                     | 77 (77.8)                                     | 0.560                 |
| Cognitive impairment, <i>n</i> (%)               | 83 (68.6)                  | 20 (71.4)                                     | 63 (63.6)                                     | 0.349                 |
| <b>Symptom of disease onset</b>                  |                            |                                               |                                               |                       |
| Gait disorders, <i>n</i> (%)                     | 77 (64.2)                  | 17 (60.7)                                     | 60 (60.6)                                     | 0.581                 |
| Balance disorders, <i>n</i> (%)                  | 14 (11.7)                  | 1 (3.6)                                       | 13 (13.1)                                     |                       |
| Urinary dysfunctions, <i>n</i> (%)               | 14 (11.7)                  | 4 (14.3)                                      | 10 (10.1)                                     |                       |
| Cognitive impairment, <i>n</i> (%)               | 15 (12.5)                  | 3 (10.7)                                      | 12 (12.1)                                     |                       |
| <b>Fall in the last year, <i>n</i> (%)</b>       | 88 (72.7)                  | 20 (71.4)                                     | 68 (68.7)                                     | 0.804                 |
| <b>Urinary dysfunctions*</b>                     |                            |                                               |                                               |                       |
| <b>Neurological examination</b>                  |                            |                                               |                                               |                       |
| Partial MDS-UPDRS, motor section score           | 6.0 (3.0-14.0)             | 10.0 (4.0-18.0)                               | 6.0 (3.0-12.5)                                | 0.164                 |
| Rest tremor, <i>n</i> (%)                        | 23 (18.1)                  | 7 (25.0)                                      | 16 (16.2)                                     | 0.262                 |
| Gait impairment, <i>n</i> (%)                    | 2 (1-2)                    | 2 (1-2)                                       | 2 (1-2)                                       | 0.302                 |
| Festination, <i>n</i> (%)                        | 15 (12.4)                  | 3 (10.7)                                      | 12 (12.1)                                     | 0.592                 |
| Heel height reduction, <i>n</i> (%)              | 89 (70.1)                  | 20 (71.4)                                     | 69 (69.7)                                     | 0.443                 |
| Petit-pas gait, <i>n</i> (%)                     | 62 (52.1)                  | 20 (71.4)                                     | 42 (42.4)                                     | <b>0.007</b>          |
| Varus, <i>n</i> (%)                              | 59 (46.5)                  | 9 (32.1)                                      | 50 (50.5)                                     | 0.066                 |
| Wide-based gait, <i>n</i> (%)                    | 78 (61.4)                  | 18 (64.3)                                     | 60 (60.6)                                     | 0.326                 |
| Arm swing reduction, <i>n</i> (%)                | 70 (59.3)                  | 18 (64.3)                                     | 52 (52.5)                                     | 0.174                 |
| Freezing, <i>n</i> (%)                           | 15 (11.8)                  | 6 (21.4)                                      | 9 (9.1)                                       | 0.074                 |
| Start hesitation, <i>n</i> (%)                   | 13 (10.2)                  | 6 (21.4)                                      | 7 (7.1)                                       | <b>0.036</b>          |
| <b>TUGT (<i>seconds</i>)</b>                     | 4.7 (3.7-13.3)             | 4.8 (4.0-20.0)                                | 4.7 (3.7-12.7)                                | 0.367                 |
| <b>18-meters walking test</b>                    |                            |                                               |                                               |                       |
| Time 18-m ( <i>seconds</i> )                     | 25.5 (19.8-33.0)           | 29.4 (20.9-33.4)                              | 23.9 (19.5-32.5)                              | 0.212                 |
| Gait Speed ( <i>meters for second</i> )          | 0.7 (0.5-0.9)              | 0.6 (0.5-0.8)                                 | 0.8 (0.5-0.9)                                 | 0.123                 |
| Step length ( <i>meters</i> )                    | 1.4 (0.5-2.1)              | 1.5 (0.4-2.0)                                 | 1.3 (0.5-2.2)                                 | 0.636                 |
| <b>Number of steps (180° turn)</b>               | 4 (3-6)                    | 5 (4-6)                                       | 4 (3-6)                                       | 0.414                 |
| <b>Postural Stability</b>                        | 2 (1-3)                    | 2 (1-3)                                       | 2 (2-3)                                       | 0.289                 |
| <b>Scores</b>                                    |                            |                                               |                                               |                       |
| iNPH grading scale (max 12)                      | 6 (4-7)                    | 6 (5-7)                                       | 5 (4-7)                                       | 0.330                 |
| Gait status scale (max 16)                       | 5 (3-8)                    | 5 (3-9)                                       | 5 (2-8)                                       | 0.172                 |
| Tinetti balance                                  | 13 (10-15)                 | 12 (10-14)                                    | 13 (10-15)                                    | 0.222                 |
| Tinetti gait                                     | 8 (5-9)                    | 7 (4-8)                                       | 8 (6-10)                                      | <b>0.017</b>          |
| Tinetti total score (max 28)                     | 21 (15-24)                 | 19 (14-21)                                    | 22 (16-25)                                    | 0.052                 |
| FIM scale (max 126)                              | 112 (100-121)              | 107 (98-117)                                  | 114 (100.5-121.5)                             | 0.225                 |
| mRankin Scale (max 6)                            | 2 (1-3)                    | 3 (2-3)                                       | 2 (1-3)                                       | 0.075                 |
| MMSEc (max 30)                                   | 26.3 (23.7-27.7)           | 23.4 (19.4-26.3)                              | 26.7 (24.7-27.7)                              | <b>0.003</b>          |
| Brief Mental Deterioration Battery               | 0.71 (-0.34-1.35)          | 0.67 (-1.04-1.24)                             | 0.76 (-0.55-1.40)                             | 0.365                 |
| <b>Dopaminergic treatment</b>                    |                            |                                               |                                               |                       |
| Levodopa treatment, <i>n</i> (%)                 | 36 (28.4)                  | 12 (42.9)                                     | 24 (24.2)                                     | 0.061                 |
| Levodopa max daily posology (mg)                 | 300 (300-450)              | 400 (300-600)                                 | 300 (200-450)                                 | 0.226                 |
| Response to Levodopa, <i>n</i> (%)               | 15 (11.8)                  | 7 (25.0)                                      | 8 (8.1)                                       | 0.151                 |
| <b>Magnetic resonance imaging:</b>               |                            |                                               |                                               |                       |
| ARWMC score                                      | 8 (4-12)                   | 8.5 (4.5-12)                                  | 7.5 (4-12)                                    | 0.915                 |
| Fazekas score                                    | 3 (2-4)                    | 2 (1.5-3.5)                                   | 3 (2-4)                                       | 0.561                 |

Continuous variables are expressed as median (interquartile range).

\*Urinary dysfunctions include the following: nycturia, urinary incontinence, pollakiuria, and urinary urgency.

Legend=  $\alpha$ -syn-LB: Lewy body-associated  $\alpha$ -synuclein seeding activity; ARWMC: Age-Related White Matter Changes; FIM: Functional Independence Measure; iNPH: idiopathic Normal Pressure Hydrocephalus; MDS-UPDRS: Movement Disorder Society-Unified Parkinson's Disease Rating Scale; MMSEc: corrected Mini-Mental State Examination; mRankin: Modified Rankin Scale; MRI: magnetic resonance imaging; TUGT: timed up and go test.

**Table S5.** Comparisons between Aβ+ vs. Aβ- subgroups of patients from the Bologna PRO-HYDRO cohort.

|                                           | <b>Aβ+</b>       | <b>Aβ-</b>       | <b>p-value</b> |
|-------------------------------------------|------------------|------------------|----------------|
| <b>N</b>                                  | 32               | 94               |                |
| <b>Males, n (%)</b>                       | 22 (68.8)        | 61 (64.9)        | 0.830          |
| <b>Age at disease onset, years</b>        | 74.0 (70.0-77.0) | 72.0 (69.0-76.0) | 0.258          |
| <b>Age at evaluation, years</b>           | 77.5 (72.5-79.0) | 76.0 (72.0-79.0) | 0.213          |
| <b>Disease duration &lt;1 year, n (%)</b> | 6 (18.8)         | 14 (14.9)        | 0.125          |
| <b>Symptom of disease onset:</b>          |                  |                  |                |
| Gait disorders, n (%)                     | 17 (53.1)        | 59 (62.8)        | 0.107          |
| Balance disorders, n (%)                  | 3 (9.4)          | 11 (11.7)        |                |
| Urinary dysfunctions, n (%)               | 1 (3.1)          | 13 (13.8)        |                |
| Cognitive impairment, n (%)               | 7 (21.9)         | 8 (8.5)          |                |
| <b>Symptoms at first evaluation:</b>      |                  |                  |                |
| Gait disorders, n (%)                     | 28 (87.5)        | 90 (95.7)        | 0.426          |
| Urinary dysfunctions, n (%)               | 21 (65.6)        | 78 (83.0)        | 0.560          |
| Cognitive impairment, n (%)               | 23 (71.9)        | 59 (62.8)        | 0.108          |
| <b>Fall in the last year, n (%)</b>       | 19 (59.4)        | 68 (72.3)        | 0.231          |
| <b>Number of urinary dysfunctions*</b>    | 3 (1-4)          | 3 (2-4)          | 0.233          |
| <b>Neurological examination:</b>          |                  |                  |                |
| Partial MDS-UPDRS, motor section score    | 6.5 (2.0-14.5)   | 6.0 (4.0-13.0)   | 0.984          |
| Rest tremor, n (%)                        | 6 (19.4)         | 16 (17.8)        | 0.196          |
| Gait impairment, n (%)                    | 2 (1-2)          | 2 (1-2)          | 0.302          |
| Festination, n (%)                        | 2 (6.3)          | 13 (13.8)        | 0.218          |
| Heel height reduction, n (%)              | 23 (71.9)        | 66 (70.2)        | 0.587          |
| Petit-pas gait, n (%)                     | 18 (56.3)        | 43 (45.7)        | 0.200          |
| Varus, n (%)                              | 13 (40.6)        | 46 (48.9)        | 0.263          |
| Wide-based gait, n (%)                    | 19 (59.4)        | 58 (61.7)        | 0.452          |
| Arm swing reduction, n (%)                | 19 (59.4)        | 51 (54.3)        | 0.409          |
| Freezing, n (%)                           | 2 (6.3)          | 12 (12.8)        | 0.253          |
| Start hesitation, n (%)                   | 5 (15.6)         | 7 (7.5)          | 0.155          |
| <b>TUGT (seconds)</b>                     | 5.3 (4.3-15.6)   | 4.7 (3.5-12.9)   | 0.301          |
| <b>18-meters walking test:</b>            |                  |                  |                |
| Time 18-m (seconds)                       | 28.1 (19.7-38.8) | 25.4 (20.4-32.8) | 0.818          |
| Gait Speed (meters for second)            | 0.6 (0.5-0.9)    | 0.7 (0.53-0.9)   | 0.924          |
| Step length (meters)                      | 0.9 (0.5-2.0)    | 1.4 (0.5-2.2)    | 0.616          |
| <b>Number of steps (180° turn)</b>        | 4 (3-7)          | 4 (3-6)          | 0.663          |
| <b>Postural Stability</b>                 | 2 (1-3)          | 2 (2-3)          | 0.472          |
| <b>Scores:</b>                            |                  |                  |                |
| iNPH grading scale (max 12)               | 6 (5-7)          | 5.5 (4-7)        | 0.293          |
| Gait status scale (max 16)                | 5 (3-7)          | 5 (2-8)          | 0.692          |
| Tinetti balance                           | 13.5 (10-15)     | 13 (10-14)       | 0.257          |
| Tinetti gait                              | 7.5 (5-9)        | 8 (5-9)          | 0.813          |
| Tinetti total score (max 28)              | 21.5 (16-24)     | 21 (15-24)       | 0.600          |
| FIM scale (max 126)                       | 105 (96-123)     | 114.5 (102-121)  | 0.259          |
| mRankin Scale (max 6)                     | 2 (1-3)          | 2 (1-3)          | 0.566          |
| MMSEc (max 30)                            | 24.5(19.3-27.4)  | 26.4(24.7-27.7)  | <b>0.037</b>   |
| Brief Mental Deterioration Battery        | -0.6 (-2.2-0.8)  | 0.9 (0.3-1.5)    | <b>0.0003</b>  |
| <b>Levodopa treatment</b>                 | 9 (28.1)         | 26 (27.7)        | 0.564          |
| <b>Magnetic resonance imaging:</b>        |                  |                  |                |
| ARWMC score                               | 6.0 (4.0-11.0)   | 9.0 (4.0-13.0)   | 0.161          |
| Fazekas score                             | 2.0 (2.0-3.0)    | 3.0 (1.0-4.0)    | 0.326          |

Data were available for 126 out 127 patients of the Bologna PRO-hydro cohort.

Continuous variables are expressed as median (interquartile range).

\*Urinary dysfunctions include the following: nycturia, urinary incontinence, pollakiuria, and urinary urgency.

Legend= ARWMC: Age-Related White Matter Changes; FIM: Functional Independence Measure; iNPH: idiopathic Normal Pressure Hydrocephalus; MDS-UPDRS: Movement Disorder Society-Unified Parkinson's Disease Rating Scale; MMSEc: corrected Mini-Mental State Examination; mRankin: Modified Rankin Scale; TUGT: timed up and go test.

**Table S6.** Comparisons between responders and non-responders 6 months after surgery.

| <b>Bologna iNPH cohort - 6 months follow-up</b> | <b>Non-Responders (n=47)</b> | <b>Responders (n=42)</b> | <b>p-value</b> |
|-------------------------------------------------|------------------------------|--------------------------|----------------|
| <b>Males, n (%)</b>                             | 37 (78.7)                    | 22 (52.4)                | <b>0.009</b>   |
| <b>Age at evaluation, years</b>                 | 76 (72-79)                   | 75 (72-78)               | 0.599          |
| <b>Age at disease onset, years</b>              | 72 (67-75)                   | 73 (69-76)               | 0.645          |
| <b>Symptoms at first evaluation</b>             |                              |                          |                |
| Gait disorders, n (%)                           | 45 (95.7)                    | 42 (100.0)               | 0.176          |
| Urinary dysfunctions, n (%)                     | 36 (76.6)                    | 35 (30.1)                | 0.430          |
| Cognitive impairment, n (%)                     | 36 (76.6)                    | 25 (59.5)                | 0.083          |
| <b>Symptom at disease onset</b>                 |                              |                          |                |
| Gait disorders, n (%)                           | 29 (61.7)                    | 27 (64.3)                | 0.127          |
| Balance disorders, n (%)                        | 4 (8.5)                      | 7 (16.7)                 |                |
| Urinary dysfunctions, n (%)                     | 3 (6.4)                      | 5 (11.9)                 |                |
| Cognitive impairment, n (%)                     | 11 (23.4)                    | 3 (7.1)                  |                |
| <b>Fall in the last year, n (%)</b>             | 30 (63.8)                    | 35 (83.3)                | <b>0.038</b>   |
| <b>Number of urinary dysfunctions</b>           | 3 (1-4)                      | 2 (1-4)                  | 0.316          |
| <b>Neurological examination</b>                 |                              |                          |                |
| Rigidity, n (%)                                 | 30 (63.8)                    | 18 (42.9)                | <b>0.035</b>   |
| Partial MDS-UPDRS score, motor section          | 10 (4-15)                    | 5.5 (2-11)               | 0.071          |
| Gait impairment, n (%)                          | 2 (1-2)                      | 2 (1-3)                  | <b>0.035</b>   |
| Festination, n (%)                              | 6 (12.8)                     | 5 (11.9)                 | 0.936          |
| Petit-pas gait, n (%)                           | 22 (46.8)                    | 23 (54.8)                | 0.516          |
| Varus, n (%)                                    | 26 (55.3)                    | 16 (38.1)                | 0.084          |
| Wide-based gait, n (%)                          | 30 (63.8)                    | 24 (57.1)                | 0.521          |
| Freezing, n (%)                                 | 7 (14.9)                     | 5 (11.9)                 | 0.651          |
| Start hesitation, n (%)                         | 5 (10.6)                     | 6 (14.3)                 | 0.628          |
| <b>Timed up to go test (seconds)</b>            | 5.7 (4.0-18.7)               | 5.0 (4.0-15.0)           | 0.773          |
| <b>18-meter walking test</b>                    |                              |                          |                |
| Time (seconds)                                  | 23.3 (18.9-31.0)             | 28.7 (20.9-34.3)         | 0.189          |
| Gait Speed (meters for second)                  | 0.8 (0.6-0.9)                | 0.6 (0.5-0.8)            | 0.123          |
| <b>Postural Stability</b>                       | 2 (1-3)                      | 3 (2-3.5)                | 0.124          |
| <b>Scores</b>                                   |                              |                          |                |
| iNPH grading scale (max 12)                     | 6 (4-6)                      | 6 (4-7)                  | 0.724          |
| Gait status scale (max 16)                      | 3.5 (3-6)                    | 6 (4-8)                  | <b>0.025</b>   |
| Tinetti Balance                                 | 14 (11-15)                   | 12 (10-14)               | 0.139          |
| Tinetti Gait                                    | 8 (6-9)                      | 7 (4-9)                  | 0.203          |
| Tinetti total score (max 28)                    | 22 (17-24)                   | 20 (14-23)               | 0.150          |
| mRankin Scale (max 6)                           | 2 (1-3)                      | 3 (2-3)                  | <b>0.008</b>   |
| MMSEc (max 30)                                  | 26.3 (24-27.7)               | 25.8 (23.2-27.3)         | 0.370          |
| Brief Mental Deterioration Battery              | 0.53 (-0.59-1.05)            | 0.88 (0.08-1.47)         | 0.160          |
| <b>Levodopa treatment</b>                       | 19 (40.4)                    | 9 (21.4)                 | 0.069          |
| <b>ARWMC score - MRI</b>                        | 8 (6-13)                     | 6.5 (4-10)               | 0.184          |
| <b>Fazekas score - MRI</b>                      | 3 (2-4)                      | 2 (1-3)                  | 0.200          |
| <b>CSF biomarkers</b>                           |                              |                          |                |
| NfL (pg/ml)                                     | 1063.1 (810.5-1671)          | 1054.9 (730.5-1274.0)    | 0.360          |
| total-tau (pg/ml)                               | 191.0 (142.0-278.0)          | 196.0 (135.0-254.0)      | 0.754          |
| phospho-tau (pg/ml)                             | 27.7 (20.1-35.6)             | 23.0 (19.9-33.0)         | 0.345          |
| A $\beta$ 42/40 ratio                           | 0.9 (0.7-1.0)                | 0.9 (0.6-1.0)            | 0.475          |
| Positive $\alpha$ -syn RT-QuIC, n (%)           | 9 (19.2)                     | 9 (21.4)                 | 0.789          |

Data are expressed as median (interquartile range).

Legend= A $\beta$ : amyloid-beta;  $\alpha$ -syn:  $\alpha$ -synuclein; ARWMC: Age-Related White Matter Changes; MDS-UPDRS: Movement Disorder Society-sponsored revision of the Unified Parkinson's Disease Rating Scale; MMSEc: corrected Mini-Mental State Examination; mRankin: Modified Rankin Scale; MRI: magnetic resonance imaging; NfL: neurofilament-light chain protein; RT-QuIC: real-time quaking-induced conversion.
